# Supplementary material for: Assessing measures of comorbidity and functional status for risk adjustment to compare hospital performance for colorectal cancer surgery: a retrospective data-linkage study
Source: Springer Nature journal article supplement (doi:10.1186/s12911-015-0175-1), 2015-07-14
Supplement: MOESM1 [file 9756340]

**ICD Procedure codes used to obtain ASA score**

92508: Neuraxial block

92509: Regional block, nerve of head or neck

92510: Regional block, nerve of trunk

92511: Regional block, nerve of upper limb

92512: Regional block, nerve of lower limb

92513: Infiltration of local anaesthetic

92514: General anaesthesia

92515: Sedation

92519: Intravenous regional anaesthesia
